# Supplementary material
Source: PubMed Central journal article supplement (PMC5499821)
Supplement: am7b02867_si_001.pdf [file am7b02867_si_001.pdf]

# Supporting Information

## Enabling ambipolar to heavy n-type transport in PbS quantum dot solids through doping with organic molecules

*Mohamad Insan Nugraha,<sup>†,‡</sup> Shohei Kumagai,<sup>‡</sup> Shun Watanabe,<sup>‡,δ</sup> Mykhailo Sytnyk,<sup>ξ</sup>  
Wolfgang Heiss,<sup>ξ</sup> Maria Antonietta Loi,<sup>†,\*</sup> Jun Takeya<sup>‡,\*</sup>*

<sup>†</sup>Zernike Institute for Advanced Materials, University of Groningen, Nijenborgh 4,  
Groningen 9747AG, the Netherlands

<sup>‡</sup>Department of Advanced Materials Science, School of Frontier Sciences, the University of  
Tokyo, 5-1-5 Kashiwanoha, Kashiwa, Chiba 277-8561, Japan

<sup>δ</sup>JST, PRESTO, 4-1-8 Honcho, Kawaguchi, Saitama, 332-0012, Japan

<sup>ξ</sup>Materials for Electronics and Energy Technology (i-MEET), Friedrich-Alexander-  
Universität Erlangen-Nürnberg, Martensstraße 7, 91058 Erlangen, Germany and Energie  
Campus Nürnberg (EnCN), Fürther Straße 250, 90429 Nürnberg, Germany.

### Corresponding Author

\*E-mail: m.a.loi@rug.nl, takeya@k.u-tokyo.ac.jp

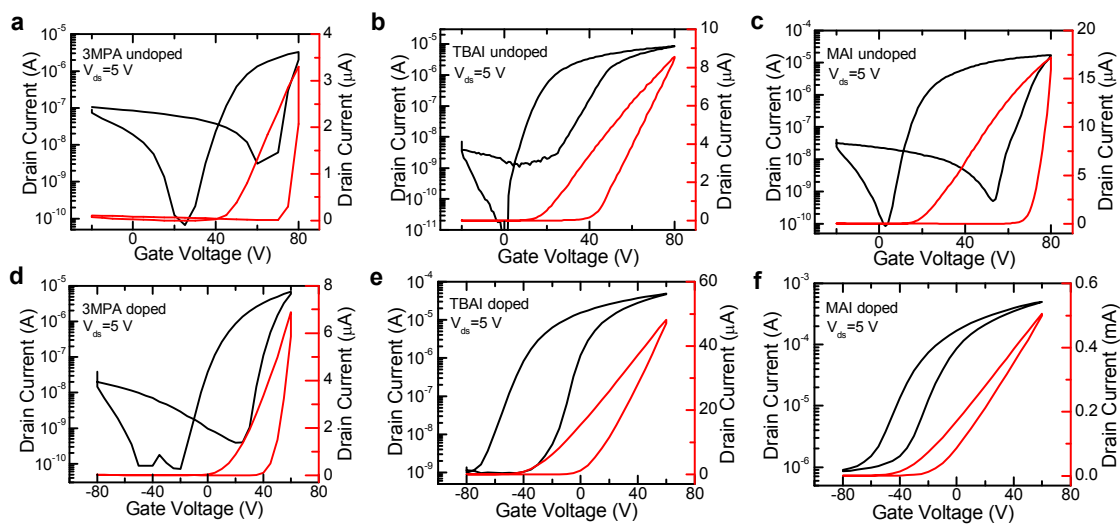

Figure S1. The hysteresis profile in the transfer characteristics of the devices with different capping ligands before (a-c) and after BV doping (d-f).

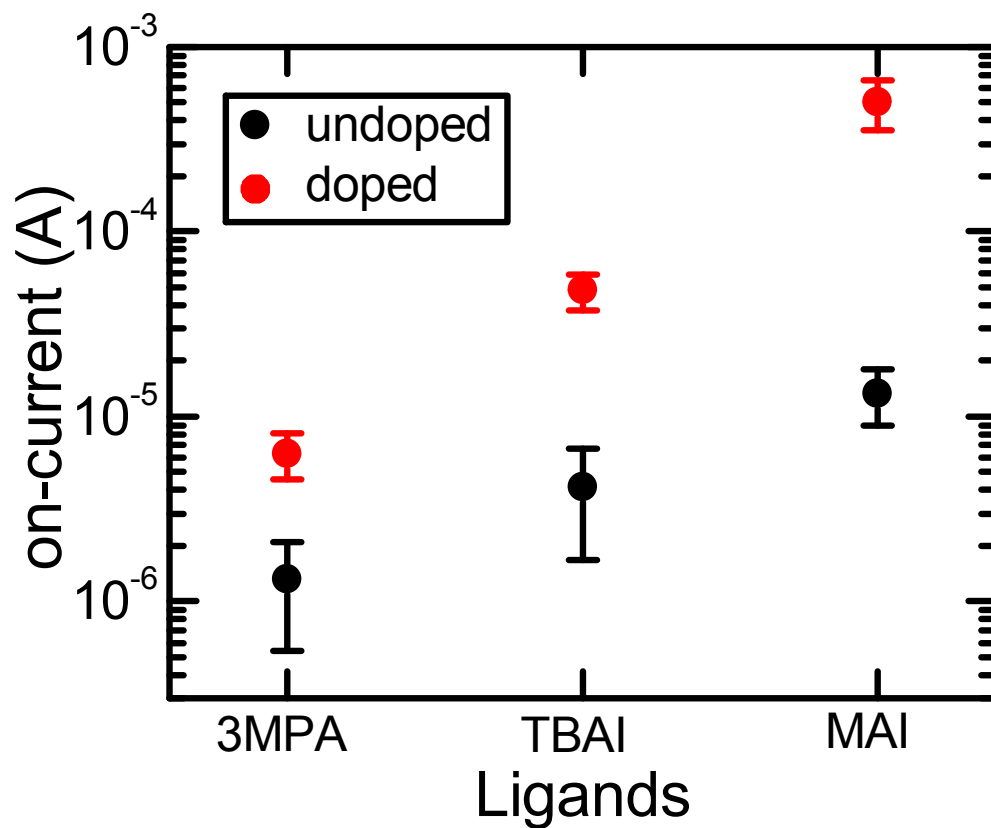

Figure S2. Comparison of on-current before and after BV doping treatment with given standard deviation.

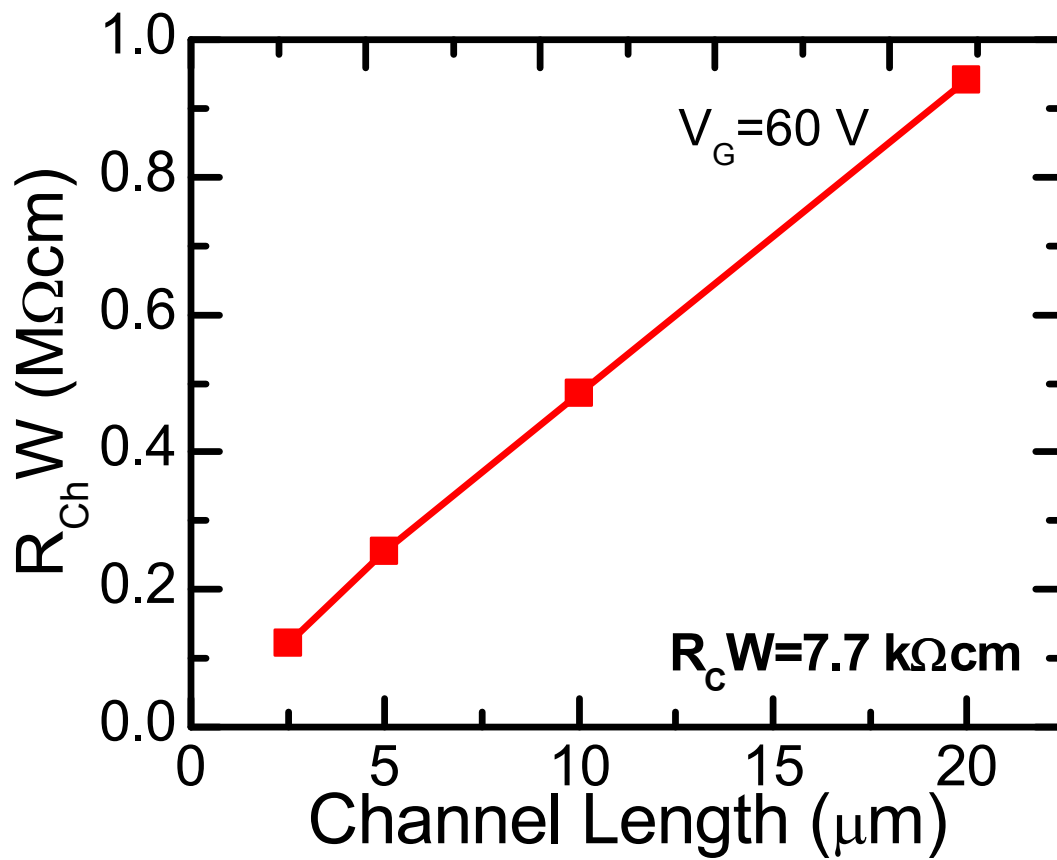

Figure S3. Channel resistance of the pristine FET devices. The calculated contact resistance is 7.7 k $\Omega$ cm.

**TABLE S-1.** Electrical properties of PbS FETs with different capping ligands before and after BV treatment. The standard deviation of mobility and threshold voltage is given in parentheses.

| Ligands | 2T Mobility ( $\text{cm}^2\text{V}^{-1}\text{s}^{-1}$ ) |                                                  | Threshold Voltage (V) |             | n ( $10^{12} \text{ cm}^{-2}$ ) |
|---------|---------------------------------------------------------|--------------------------------------------------|-----------------------|-------------|---------------------------------|
|         | Pristine                                                | BV-treated                                       | Pristine              | BV-treated  |                                 |
| 3MPA    | $2.6 \times 10^{-3}$<br>( $8.6 \times 10^{-4}$ )        | $5.1 \times 10^{-3}$<br>( $2.1 \times 10^{-3}$ ) | 36 (3.7)              | 18.8 (4.4)  | 1.6                             |
| TBAI    | $5.3 \times 10^{-3}$<br>( $9.5 \times 10^{-4}$ )        | $1.4 \times 10^{-2}$<br>( $7.7 \times 10^{-4}$ ) | 16.5 (5.8)            | -17.1 (5.1) | 3.2                             |
| MAI     | 0.03<br>(0.01)                                          | 0.32<br>(0.11)                                   | 12.2 (3.9)            | -35 (5.7)   | 4.4                             |
